# Supplementary material for: A general formulation approach for the fabrication of water repellent materials: how composition can impact resilience and functionality
Source: Royal Society of Chemistry journal article supplement (doi:10.1039/c9me00144a), 2019-11-20
Supplement: c9me00144a4.pdf [file c9me00144a4.pdf]

**Supplementary Video Cloud Links:**

**Movie S3.** Self-cleaning test SiO<sub>2</sub>-PDMS [link](#)

**Movie S4.** Self-cleaning test SiO<sub>2</sub>-PDMS [link](#)

**Movie S5.** Self-cleaning test SiO<sub>2</sub>-PDMS [link](#)
